# Supplementary material
Source: PubMed Central journal article supplement (PMC5326570)
Supplement: PRO-26-617-s001.pdf [file PRO-26-617-s001.pdf]

**Supplementary Figure S1.** Stereo view of superposition of a nucleoporin 54 SEA domain (pdb: 5c2u, black trace) with (A). a canonical SEA domain from Muc16 (pdb: 1ivz, red trace) and (B). a SEA domain from Notch3 (pdb: 4hti, red trace). Beta-bulges with the  $\phi x x \phi$  motif are colored blue. The region with the  $\phi x x x \phi$  motif in Muc16 is colored magenta.

(A)

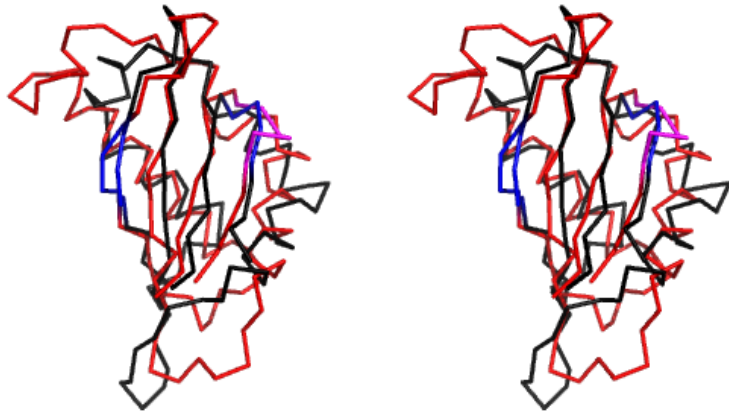

(B)

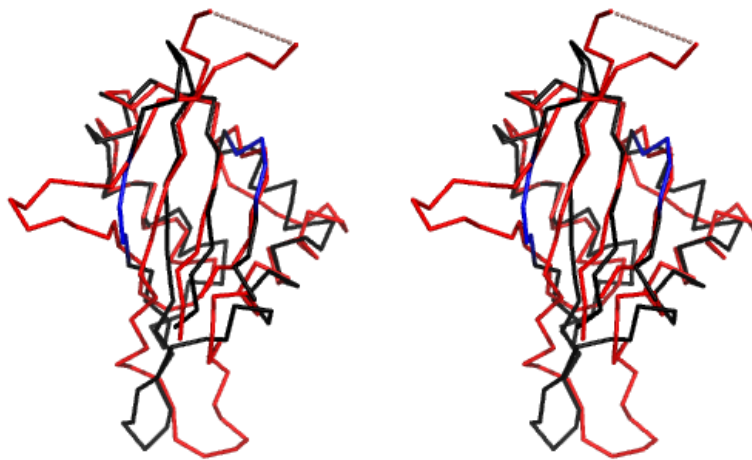

**Supplementary Table S2.** Phyletic distribution of SEA domain groups. Known and novel SEA domain groups are colored blue and red, respectively.

| SEA domain group                           | Pfam family                   | vertebrates | non-vertebrate chordates | non-chordate metazoans | Choano-flagellates | Filasterea | non-Holozoa |
|--------------------------------------------|-------------------------------|-------------|--------------------------|------------------------|--------------------|------------|-------------|
| receptor phosphatase R (PTPRR) SEA domains | N/A                           | ✓           |                          |                        |                    |            |             |
| EpCAM SEA domains                          | N/A                           | ✓           |                          |                        |                    |            |             |
| CD34 SEA domains                           | CD34_antigen (PF06365)        | ✓           | ✓                        |                        |                    |            |             |
| Collectrin SEA domains                     | Collectrin (PF16959)          | ✓           | ✓                        |                        |                    |            |             |
| $\alpha/\epsilon$ -sarcoglycan SEA domains | Sarcoglycan_2 (PF05510)       | ✓           | ✓                        | ✓                      |                    |            |             |
| receptor phosphatase IA-2 SEA domains      | Receptor_IA-2 (PF11548)       | ✓           | ✓                        | ✓                      |                    |            |             |
| Notch SEA domains                          | NOD(PF06816)<br>NODP(PF07684) | ✓           | ✓                        | ✓                      |                    |            |             |
| Amnionless SEA domains                     | Amnionless (PF14828)          | ✓           | ✓                        | ✓                      |                    |            |             |
| CELSR/FAT cadherin SEA domains             | N/A                           | ✓           | ✓                        | ✓                      |                    |            |             |
| CDH23/PCDH15/CDHR2 cadherin SEA domains    | N/A                           | ✓           | ✓                        | ✓                      | ✓                  |            |             |
| Canonical SEA domains                      | SEA (PF01390)                 | ✓           | ✓                        | ✓                      | ✓                  |            |             |
| Nup54 SEA domains                          | N/A                           | ✓           | ✓                        | ✓                      | ✓                  |            |             |
| dystroglycan SEA domains                   | DAG1 (PF05454)                | ✓           | ✓                        | ✓                      |                    | ✓          |             |
| KIAA0319 SEA domains                       | N/A                           | ✓           | ✓                        | ✓                      |                    | ✓          |             |
| Fibrocystin-like SEA domains               | N/A                           | ✓           | ✓                        | ✓                      | ✓                  |            | ✓           |
